# Supplementary material
Source: publisher figshare collection journal article supplement (https://acs.figshare.com/ndownloader/files/25899282)
Supplement: Supplementary file 1 [file 25899282]

# **Paper-Based Bipolar Electrode Electrochemiluminescence Platform for Detection of Multiple miRNAs**

Fangfang Wang<sup>#,a</sup>, Yunqing Liu<sup>#,a</sup>, Cuiping Fu<sup>a</sup>, Na Li<sup>b</sup>, Miao Du<sup>\*,c</sup>, Lina Zhang<sup>\*,d</sup>, Shenguang Ge<sup>\*,a</sup>, Jinghua Yu<sup>b</sup>

*<sup>a</sup>Collaborative Innovation Center of Technology and Equipment for Biological Diagnosis and Therapy in Universities of Shandong, Institute for Advanced Interdisciplinary Research, University of Jinan, Jinan 250022, P.R. China*

*<sup>b</sup>School of Chemistry and Chemical Engineering, University of Jinan, Jinan 250022, P.R. China*

*<sup>c</sup> College of Chemistry, Chemical Engineering and Materials Science; Shandong Normal University, Jinan, 250014, China*

*<sup>d</sup>Shandong Provincial Key Laboratory of Preparation and Measurement of Building Materials, School of Material Science and Engineering, University of Jinan, Jinan 250022, PR China*

Corresponding author:

Miao Du (miaodu@sdu.edu.cn); Lina Zhang (zhanglina818@126.com), Shenguang Ge (chm\_gesg@163.com)

<sup>#</sup>These authors contributed equally to this work.

## Table of contents

|                                                                                                                                                          |   |
|----------------------------------------------------------------------------------------------------------------------------------------------------------|---|
| S1. Reagent and Instrument .....                                                                                                                         | 3 |
| S1.1 Reagent .....                                                                                                                                       | 3 |
| S1.2 Instrument .....                                                                                                                                    | 4 |
| S2. The AI design picture and actual photos of the closed parallel bipolar electrode<br>paper chip .....                                                 | 4 |
| S3. Synthesis of materials. ....                                                                                                                         | 5 |
| S3.1 Synthesis of CdTe QDs-H2. ....                                                                                                                      | 5 |
| S3.2 Synthesis of Fe <sub>3</sub> O <sub>4</sub> -H1-S2 Magnetic Nanomaterial.....                                                                       | 5 |
| S3.3 Synthesis of Au@g-C <sub>3</sub> N <sub>4</sub> NSs -DNA1 .....                                                                                     | 5 |
| S4. Condition optimization and electrochemical characterization of the potential-<br>resolved bipolar electrode electrochemiluminescence biosensor. .... | 6 |
| References .....                                                                                                                                         | 9 |

## S1. Reagent and Instrument

### S1.1 Reagent

Cadmium Chloride ( $\text{CdCl}_2$ ), 3-Mercaptopropionic acid (MPA), sodium tellurite ( $\text{Na}_2\text{TeO}_3$ ), trisodium citrate dihydrate, 1-(3-Dimethylaminopropyl)-3-ethylcarbodiimide hydrochloride (EDC), N-Hydroxy succinimide (NHS), melamine, potassium persulfate ( $\text{K}_2\text{S}_2\text{O}_8$ ) hydroxylammonium chloride and gold chloride ( $\text{HAuCl}_4$ ), were obtained from Shanghai Aladdin biochemical technology co., LTD. (Shanghai, China). 6-Mercapto-1-hexanol (MCH) and monoethanolamine (MEA) were provided by Shanghai yi'en chemical technology co., LTD. (Shanghai, China).  $\text{H}_2\text{O}_2$  was purchased from Shanghai vok biotechnology co., LTD. (Shanghai, China). The used chemicals are not required to be repurified and can be used according to the original analytical grade purchased. 0.1 M phosphate buffer solution (PBS) was prepared by mixing  $\text{Na}_2\text{HPO}_4$  and  $\text{KH}_2\text{PO}_4$  stock solution in appropriate proportion. All solutions were freshly prepared using ultrapure water (resistivity  $\geq 18 \text{ M}\Omega\cdot\text{cm}$ ) as a solvent. Whatman chromatography paper 1 was purchased from GE Healthcare Worldwide (Shanghai, China). The biological chains (DNA and RNA fragments) used in the study were supplied by Sangon (Shanghai, China). The sequences of the DNA probes and RNA targets used in this study were presented as follows:

**Table S1**

| name      | sequences (from 5' to 3')                                                 |
|-----------|---------------------------------------------------------------------------|
| H1        | TAATCGTGATAGGGGTATGGACATGGAACCCCTATCACGATTAGCATTAAAGA-NH <sub>2</sub>     |
| H2        | ATGGACATGGATAATCGTGATAGGGGTTCATGTCCATACCCCTATGAAGGAGCGACT-NH <sub>2</sub> |
| S1        | HS-CTCTGCCCTCCTTCCTAGCCGGATCGCGCTGGCCAGATGATATAAAG                        |
| S2        | HN-CTTTATATCATCTGGCCAGCGCGATCCGGCTAGGAAGGAGGGCAGAAG                       |
| h1        | GCATTTTGGTATTATTCTATCTGATTCTTAGTGTGTACCAAAAGTAATAATG-NH2                  |
| h2        | GCATTTTGGTATTATTCTATCTGATTCTTAGTGTGTACCAAAAGTAATAATG                      |
| DNA1      | NH2-TTTTGATGTGGCTGAGGATGTACCGTTTTTTTTTGGG-SH                              |
| DNA2      | SH-CCCCAAAAAACCATCCTCA                                                    |
| miRNA-126 | CAU UAU UAC UUU UGG UAC                                                   |

|           |                               |
|-----------|-------------------------------|
| miRNA-155 | UUA AUGCUAAUCGUGAUAGGGGU      |
| miRNA-141 | UAA CAC UGU CUG GUA AAG AUG G |
| miRNA-101 | UACAGUACUGUGAUAAACUGAA        |
| miRNA-210 | CU GUG CGU GUG ACA GCG GCU GA |

## S1.2 Instrument

The DC power supply (MS-305D) was provided by Dongguan Maihao Electronic Technology Co., Ltd. (Guangdong, China). CHI 760D Electrochemical Workstation was purchased from Shanghai Chenhua Instrument Co., Ltd., (Shanghai, China), which provide electrochemical impedance spectroscopy (EIS). ECL emission measurements were monitored with an MPI-A multifunctional ECL analytical system (Xi'an Remax Electronic Science & Technology Co. Ltd., Xi'an, China). The UV-visible (UV-vis) absorption spectra were tested on a UV-2550 ultraviolet-visible spectrophotometer (Shimadzu, Japan). Scanning electron microscopy (SEM) images, energy dispersive spectroscopy (EDS) and mapping were acquired with a scanning electron microscope (regulus 8100) (Hitachi hi-tech company, Japan). The transmission electron microscopy (TEM) images were obtained with a JEOL 4000 EX microscope. X-ray diffraction (XRD) were tested on a D8 advance diffractometer system equipped with Cu Ka radiation (Bruker Co., Germany). The two driving electrodes in the paper chip are made from screen-printed graphite.

## S2. The AI design picture and actual photos of the closed parallel bipolar electrode paper chip

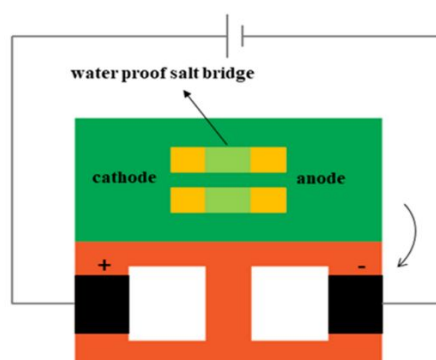

**Figure S1.** Fabrication of the paper-based closed-bipolar electrode device for miRNA-S-4

155 and miRNA-155 assay.

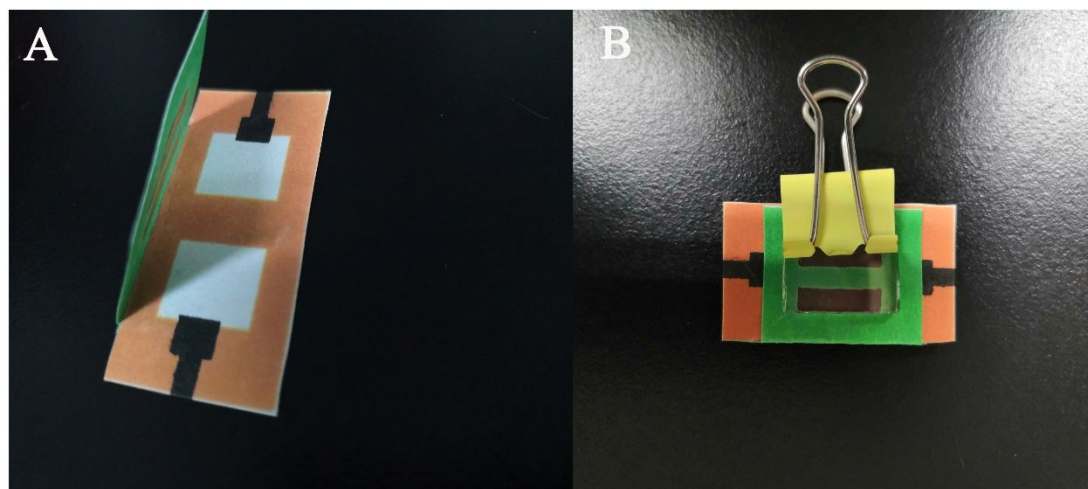

**Figure S2.** The real sample's figure of paper-based closed bipolar electrode

### **S3. Synthesis of materials.**

#### **S3.1 Synthesis of CdTe QDs-H2.**

Firstly, EDC (15  $\mu$ L, 0.2 M) and NHS (15  $\mu$ L, 0.05 M) were mixed with H2 (50  $\mu$ L, 5  $\mu$ M) to activate the amino groups of H2. Then, 10  $\mu$ L of CdTe QDs (0.05 M) were added to the above mixture solution and reacted at room temperature for 12 h. Finally, the CdTe QDs-H2 signal probe labeled with luminescent reagent was synthesized.

#### **S3.2 Synthesis of Fe<sub>3</sub>O<sub>4</sub>-H1-S2 Magnetic Nanomaterial.**

The aptamer oligonucleotides were first denatured at 95 °C for 5 min to form a hairpin structure before use. First of all, prepare the purchased carboxylated Fe<sub>3</sub>O<sub>4</sub> magnetic nanoparticles. H1 (200  $\mu$ L, 2  $\mu$ M) and S2 (100  $\mu$ L, 2  $\mu$ M) were added into the 500  $\mu$ L of Fe<sub>3</sub>O<sub>4</sub> solution, and then placed the above mixture on a shaker and reacted at 25 °C for 12 h. In order to make H1, S1 and Fe<sub>3</sub>O<sub>4</sub> magnetic nanoparticles combine fully through the interaction between amino and carboxyl groups loaded by themselves. The next, 1 mM MCH was used to block the nonspecific binding sites at room temperature for 2 h. Fe<sub>3</sub>O<sub>4</sub>-S2-H1 magnetic nanomaterials were separated from the solvent for three times by magnetic separation to remove unreacted reagents. Eventually, the magnetic nanocomposites were dispersed in ultra-pure water for further

use.

### S3.3 Synthesis of Au@g-C<sub>3</sub>N<sub>4</sub> NSs -DNA1

By slightly improving the experimental method of traditional preparation of g-C<sub>3</sub>N<sub>4</sub> NSs<sup>1-3</sup>, small-sized g-C<sub>3</sub>N<sub>4</sub> NSs (Figure S3) was obtained. First, HAuCl<sub>4</sub> (20  $\mu$ L, 0.01 M) solution is added to the prepared g-C<sub>3</sub>N<sub>4</sub> NSs (4 mL) suspension. The mixed solution was treated with ultrasonic for 10 min followed by stirring 100 min at room temperature and repeated for 3 times. After that, the freshly prepared NaBH<sub>4</sub> (50  $\mu$ L, 0.01 M) was quickly added to the above suspension to stir 30 min. Then, 10  $\mu$ L of 0.01 M sodium citrate solution was added to the suspension and stirred for 30 min. Au@g-C<sub>3</sub>N<sub>4</sub> NSs solution was obtained by 3~4 times centrifugal washing and dispersed in 2ml ultra-pure water. Finally, 10  $\mu$ L Au@g-C<sub>3</sub>N<sub>4</sub> NSs solution was mixed with DNA1 (50  $\mu$ L, 2  $\mu$ M) at room temperature for 2 h. The Au@g-C<sub>3</sub>N<sub>4</sub> NSs-DNA1 signal probe labeled with luminescent reagent was synthesized.

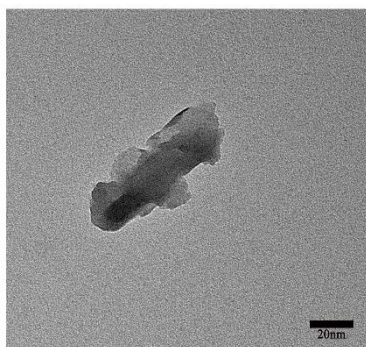

**Figure S3.** The TEM of g-C<sub>3</sub>N<sub>4</sub> NSs.

### S4. Condition optimization and electrochemical characterization of the potential-resolved bipolar electrode electrochemiluminescence biosensor.

In the typical BPE biosensor system, the ECL intensity of the luminescence system CdTe QDs-H<sub>2</sub>/S<sub>2</sub>O<sub>8</sub><sup>2-</sup> ECL and Au@g-C<sub>3</sub>N<sub>4</sub> NSs-DNA1/S<sub>2</sub>O<sub>8</sub><sup>2-</sup> is closely related to the electric field intensity between the driving electrodes. As shown in Figure S4A, when the driving voltage was 9V, the ECL intensity of the CdTe QDs-H<sub>2</sub>/S<sub>2</sub>O<sub>8</sub><sup>2-</sup> system reached the maximum intensity. As shown in Figure S4B, when the driving voltage was 12V, the ECL intensity of the Au@g-C<sub>3</sub>N<sub>4</sub> NSs-DNA1/S<sub>2</sub>O<sub>8</sub><sup>2-</sup> system reached the

maximum intensity.

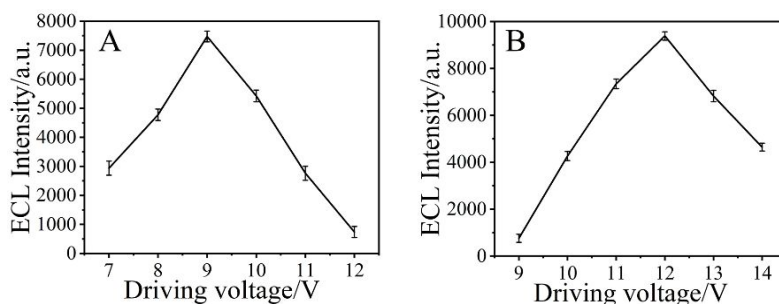

**Figure S4.** Optimization of experimental conditions for the proposed biosensor (A) The influence of drive voltage on CdTe QDs-H<sub>2</sub>/ S<sub>2</sub>O<sub>8</sub><sup>2-</sup> ECL and (B) Au@g-C<sub>3</sub>N<sub>4</sub> NSs-DNA1/ S<sub>2</sub>O<sub>8</sub><sup>2-</sup> ECL

The sensitivity of the sensor to detect the target is greatly influenced by the material of the bipolar electrode. As shown in Figure S5A, it was obvious that the complete Au-BPE was the best choice for this BPE-ECL biosensor. Figure S5B shows that the EIS curve of the gradual modification of the detection in the process of detecting miRNA-155, in which the BPE cathode surface using [Fe (CN)<sub>6</sub>]<sup>3-/4-</sup> as an electroactive probe consists of a semicircle in a higher frequency range and a straight line in a lower frequency range. In the high frequency region, the bare paper BPE is semicircular (Figure S5B, curve b), AuNPs is the improved BPE conductivity greatly increased, charge transfer resistance ( $R_{et}$ ) decreased significantly (Figure S5B, curve a). The diameter of the semicircle increases gradually, and the electron transfer resistance  $R_{et}$  increases step by step (Figure S5B, curve c, d, e), which proves the successful modification of S1, MCH and Fe<sub>3</sub>O<sub>4</sub>-S2-H1-H2-CdTe QDs respectively.

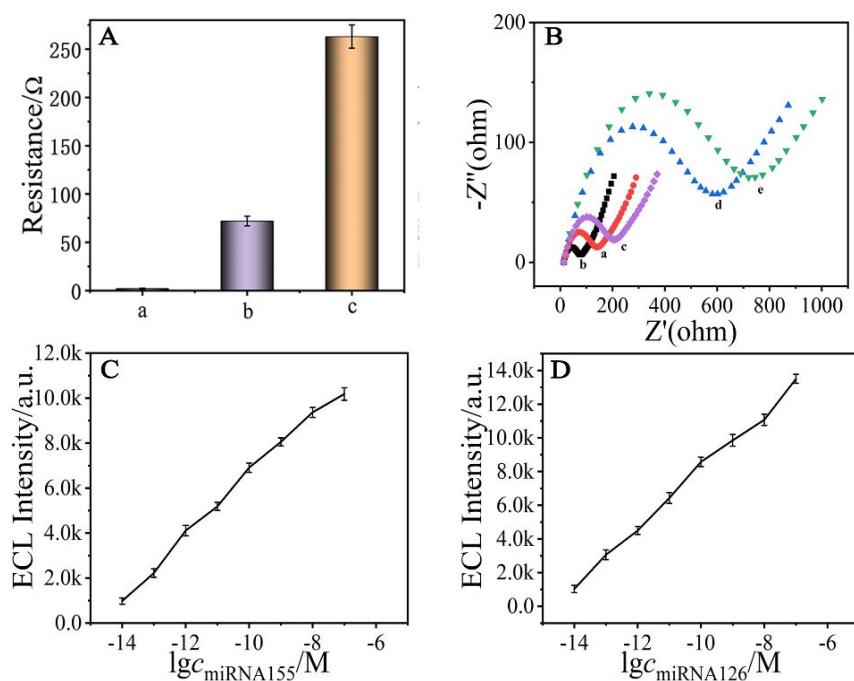

**Figure S5.** (A) Optimization of bipolar electrode materials (a) AuNPs were all grown in the BPE region, (b) the BPE area is screen-printed with graphite electrodes loaded with gold at both ends, (c) screen printed graphite electrode in BPE area. (B) EIS of electrodes with different modified in PBS (0.1 M pH 7.4) including 5.0 mM [Fe(CN)<sub>6</sub>]<sup>3-/4-</sup> (a) bare BPE, (b) Au-BPE, (c) S1/Au-BPE, (d) MCH/ S1/Au-BPE, (e) Fe<sub>3</sub>O<sub>4</sub>-S2-H1-H2-CdTe QDs/ MCH/ S1/Au-BPE. (C)The logarithmic relationship between the concentration of the miRNA-155 and the electrochemiluminescence intensity. (D)The logarithmic relationship between the concentration of the miRNA-126 and the electrochemiluminescence signal.

**Table S2**

Performance of miRNA detection contrasted with other works.

| analytical method        | detection limit | linear range    | Refs.     |
|--------------------------|-----------------|-----------------|-----------|
| Fluorescence             | 2.3 pM          | 5 pM ~ 0.5 nM   | 4         |
| Electrochemical          | 0.6 pM          | 1 pM ~ 25 nM    | 5         |
| Fluorescence             | 0.41 nM         | 0.5 nM ~ 100 nM | 6         |
| photoelectrochemistry    | 0.31 pM         | 1 pM ~ 100 nM   | 7         |
| Chronoamperometry        | 3 pM            | 10 fM ~ 5 pM    | 8         |
| electrochemiluminescence | 5.7 fM /4.2 fM  | 100 nM ~ 10 fM  | this work |



## References

- (1) Chen, L.; Zeng, X.; Si, P.; Chen, Y.; Chi, Y.; Kim, D. H.; Chen, G. *Anal Chem* **2014**, *86*, 4188-4195.
- (2) Lin, L. S.; Cong, Z. X.; Li, J.; Ke, K. M.; Guo, S. S.; Yang, H. H.; Chen, G. N. *J Mater Chem B* **2014**, *2*, 1031-1037.
- (3) Shao, H.; Lin, H.; Lu, J.; Hu, Y.; Wang, S.; Huang, Y.; Guo, Z. *Biosens Bioelectron* **2018**, *118*, 247-252.
- (4) Zeng, C.; Gao, J.; Lou, Y.; Cui, L. Enzyme-free and protein-assisted dual-amplified fluorescence anisotropy for sensitive miRNA detection in tumor cells. *Talanta* **2020**, *218*, 121179.
- (5) Zhang, Y.; Yan, Y.; Chen, W.; Cheng, W.; Li, S.; Ding, X.; Li, D.; Wang, H.; Ju, H.; Ding, S. A simple electrochemical biosensor for highly sensitive and specific detection of microRNA based on mismatched catalytic hairpin assembly. *Biosensors and Bioelectronics* **2015**, *68*, 343-349.
- (6) Wu, T.; Yang, Y.; Cao, Y.; Song, Y.; Xu, L. P.; Zhang, X.; Wang, S. Bioinspired DNA-Inorganic Hybrid Nanoflowers Combined with a Personal Glucose Meter for Onsite Detection of miRNA. *ACS Appl Mater Interfaces* **2018**, *10*, 42050-42057.
- (7) Chu, Y.; Wu, R.; Fan, G.-C.; Deng, A.-P.; Zhu, J.-J. Enzyme-Free Photoelectrochemical Biosensor Based on the Co-Sensitization Effect Coupled with Dual Cascade Toehold-Mediated Strand Displacement Amplification for the Sensitive Detection of MicroRNA-21. *ACS Sustainable Chemistry & Engineering* **2018**, *6*, 11633-11641.
- (8) Liu, L.; Xia, N.; Liu, H.; Kang, X.; Liu, X.; Xue, C.; He, X. Highly sensitive and label-free electrochemical detection of microRNAs based on triple signal amplification of multifunctional gold nanoparticles, enzymes and redox-cycling reaction. *Biosens Bioelectron* **2014**, *53*, 399-405.
